# Supplementary material for: Atmospheric breakdown kinetics and air quality impact of potential “green” solvents the oxymethylene ethers OME3 and OME4
Source: Copernicus journal article supplement (doi:10.5194/egusphere-2025-866), 2025-03-07
Supplement: Supplementary file 1 [file OMe3 APCI MS.pdf › SI/S3 OME Characterisation/S3.1 OMe3/OMe3 APCI MS.pdf]

# York - Chemistry - Mass Spectrometry Service Report

JDM-1-OMe3A\_hfs106955jm APCI

## Analysis Information

|                   |                                |                  |                     |
|-------------------|--------------------------------|------------------|---------------------|
| Analysis Filename | hfs106955jm.d                  | Acquisition Date | 31/10/2023 06:23:49 |
| Method            | APCI_LOW MASS_oTOF34 METHODS.m | Instrument       | micrOTOF            |
| Submission Name   | jwg71051rm_3                   | APCI             | Positive            |

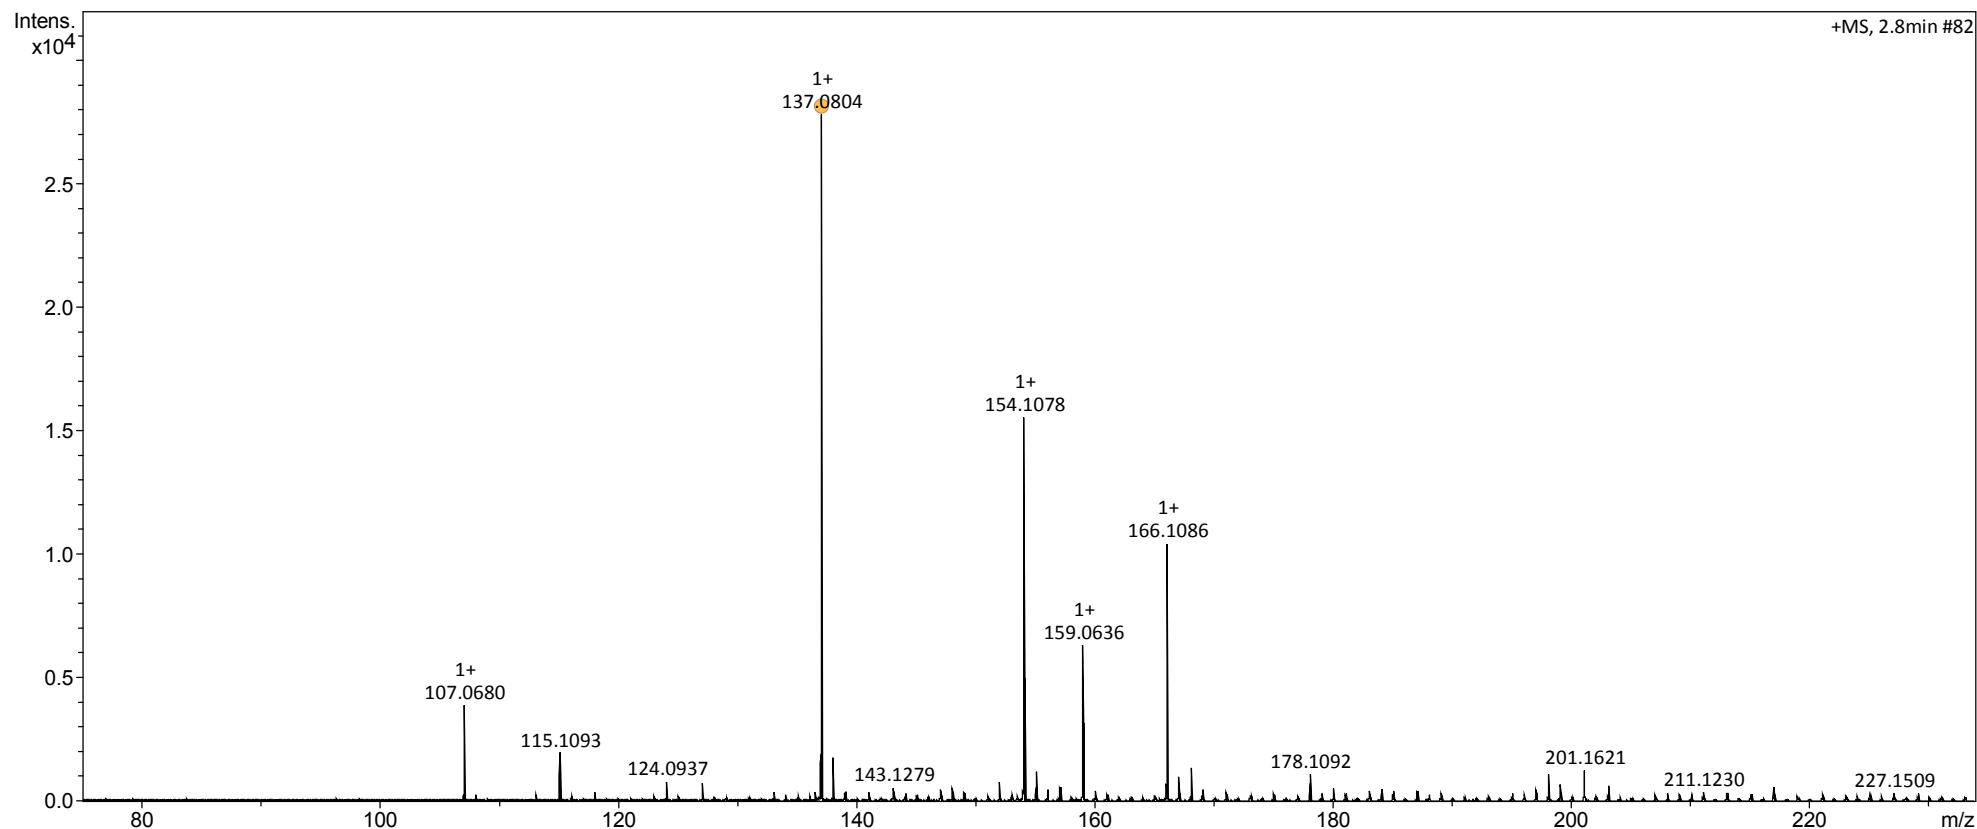

| Meas. m/z  | # | Ion Formula | m/z        | err [ppm] | err [mDa] | mSigma | Mean err [ppm] |
|------------|---|-------------|------------|-----------|-----------|--------|----------------|
| 137.080358 | 1 | C5H13O4     | 137.080835 | 3.5       | 0.5       | 4.5    | 4.1            |
