# Supplementary material for: Atmospheric breakdown kinetics and air quality impact of potential “green” solvents the oxymethylene ethers OME3 and OME4
Source: Copernicus journal article supplement (doi:10.5194/egusphere-2025-866), 2025-03-07
Supplement: Supplementary file 1 [file S2.1 Exemplar PLP-LIF Data.xlsx]

## Sheet: LIF Decays (Fig 4)
[OME3] =5.7e13		[OME3] =2.3e14		[OME3] = 4.5e14
keff = (5252 +/- 220) s-1		keff = (2756 +/- 109) s-1		keff = (964 +/- 37) s-1
t / µs	S	t / µs	S	t / µs	S
-200	1101.83	-170	-2275.8	-190	-2627.5
-176.667	441	-158.5	-1054.6	-184	2205.17
-153.333	2731.5	-147	-1116.2	-178	1035.33
-130	-3273.5	-135.5	-322	-172	1645.83
-106.667	-1390.83	-124	471	-166	1594.33
-83.3333	-729.167	-112.5	5843.8	-160	1798
-60	-322.833	-101	3219	-154	-796
-36.6667	797.167	-89.5	-811.2	-148	-2933.33
-13.3333	68972.3	-78	1570.8	-142	-2780.33
10	62002.5	-66.5	2059.6	-136	2256.17
33.3333	66987.7	-55	-2825	-130	-2983.17
56.6667	63859.7	-43.5	-2275.8	-124	-4103
80	64188.7	-32	-1360.2	-118	-4713.83
103.333	56965	-20.5	2059.2	-112	-1458.17
126.667	55667.3	-9	-1482.4	-106	1035.17
150	51394	2.5	63294.4	-100	1441.5
173.333	52919.2	14	66072.4	-94	17.6667
196.667	56430	25.5	64270.6	-88	-185.833
220	59458	37	61890.8	-82	-3137
243.333	52385.7	48.5	51573.2	-76	2409
266.667	60118.8	60	59386	-70	-1203.67
290	56353.7	83.232	57005.8	-57.879	-2830.83
313.333	50222.8	106.465	49679	-45.758	-2424
336.667	57880.5	129.697	40734.6	-33.636	-745.833
360	39385.5	152.929	47907.8	-21.515	64809.3
383.333	46789	176.162	43145.6	-9.394	65370
406.667	47094.8	199.394	33591.8	2.727	52446
430	46813.2	222.626	37162.8	14.848	63944.5
453.333	49409.5	245.859	28187.8	26.97	58907.3
476.667	42743.3	269.091	35636.8	39.091	52014.2
500	35239.7	292.323	26783.6	51.212	49317
570.707	47296.7	315.556	24524.6	63.333	47281.7
641.414	40021.3	338.788	21411.2	75.455	41786.8
712.121	33406.8	362.02	27027.4	87.576	44813.8
782.828	31475	385.253	24463.4	99.697	37410.7
853.535	33814.5	408.485	24768.8	111.818	36979.2
924.242	22468.8	431.717	20433.4	123.939	39395.7
994.949	23029.2	454.949	15061.2	136.061	23827.7
1065.66	21756.7	478.182	17687	148.182	27236.5
1136.36	26539.3	501.414	15123.8	160.303	31000.8
1207.07	22112.8	524.646	10116.2	172.424	14872.7
1277.78	21910.2	547.879	16037.8	184.545	26981
1348.49	12802.5	571.111	8101.4	196.667	25608
1419.19	18857.3	594.343	7675	208.788	22860
1489.9	19162.7	617.576	18175.2	220.909	17315.2
1560.61	12243.2	640.808	8834.8	233.03	14923.5
1631.31	11480.2	664.04	13596.8	245.152	13754
1702.02	8936.5	687.273	6270.6	257.273	9734.17
1772.73	8376.67	710.505	8346.2	269.394	15737.7
1843.43	4764.33	733.737	8468.8	281.515	13244.8
1914.14	9038.17	756.97	5355.2	293.636	7953.67
1984.85	11581.8	780.202	10911	305.758	9225.83
2055.56	7053.67	803.434	4622.8	317.879	10090.3
2126.26	5121	826.667	5293.6	330	7445.83
2196.97	6748.17	849.899	4866	342.121	11819.7
2267.68	8377.17	873.131	5966	354.242	12227
2338.38	4763.83	896.364	7186.4	366.364	9684.17
2409.09	8834.17	919.596	9078.6	378.485	9022.67
2479.8	6189.67	942.828	7125.6	390.606	8412.5
2550.51	2781.33	966.061	8285.4	402.727	5918.67
2621.21	5273.83	989.293	3584.2	414.848	-1356.5
2691.92	4815.5	1012.52	-688.8	426.97	6783.5
2762.63	4307.5	1035.76	2607.6	439.091	4545.33
2833.33	10055.8	1058.99	3157.6	451.212	3935
2904.04	-1289.17	1082.22	1813.8	463.333	3121.5
2974.75	7257.17	1105.45	4194.6	475.455	5257.5
3045.45	2831.17	1128.69	410.6	487.576	4037
3116.16	5731.67	1151.92	-2398.6	499.697	1696.33
3186.87	4307.33	1175.15	1387	511.818	577.333
3257.58	2730	1198.38	-1300	523.939	2256
3328.28	4154	1221.62	-78.4	536.061	4036.33
3398.99	1712.33	1244.85	3645.6	548.182	2611.83
3469.7	2780.83	1268.08	-2887	560.303	2052.5
3540.4	-780.5	1291.31	-2947.2	572.424	2255.5
3611.11	1304.83	1314.55	3767.6	584.545	7445.67
3681.82	339.167	1337.78	-627	596.667	1340.5
3752.53	2323.17	1361.01	2302.6	608.788	2154.17
3823.23	3849.33	1384.24	-2397.8	620.909	-135
3893.94	-882.5	1407.47	959.8	633.03	678.5
3964.65	287.667	1430.71	958.6	645.152	-1203.83
4035.35	1458.5	1453.94	-994.8	657.273	1188.17
4106.06	2627.83	1477.17	4927.6	669.394	1340.67
4176.77	-2052.17	1500.4	-2948	681.515	-1101.17
4247.48	-2459.5	1523.64	-4656.8	693.636	2714
4318.18	4509.83	1546.87	-139.4	705.758	170.333
4388.89	-2764.33	1570.1	3463	717.879	272
4459.6	33.1667	1593.33	3157.4	730	6834.67
4530.3	-4393	1616.57	-1909.6	742.121	2001.33
4601.01	695.833	1639.8	-322	754.242	-2170.33
4671.72	-5614	1663.03	1631	766.364	-3238.17
4742.42	-1034.83	1686.26	-3435.6	778.485	-1305.33
4813.13	2018.33	1709.49	-1726.2	790.606	-1356.33
4883.84	1916.17	1732.73	410	802.727	-898.333
4954.55	-170.167	1755.96	-1849.2	814.848	-1610.17
5025.25	-475	1779.19	-3680.4	826.97	526
5095.96	4662.67	1802.42	-4961.4	839.091	3985.33
5166.67	847.833	1825.66	-261.6	851.212	1136.5
5237.37	-2154	1848.89	-3985.6	863.333	729.667
5308.08	592.5	1872.12	-6304.6	875.455	1034.5
5378.79	186.333	1895.35	-4962.4	887.576	-33.1667
5449.49	-2561	1918.59	-4474	899.697	-4307
5520.2	2018.67	1941.82	1692.4	911.818	-4357.33
5590.91	1662.5	1965.05	3097.8	923.939	1544.5
5661.62	440.5	1988.28	715.2	936.061	2459.17
5732.32	2169.83	2011.52	1569.4	948.182	-5069.83
5803.03	-2764	2034.75	1081.6	960.303	-1865
5873.74	-1797.33	2057.98	3523.4	972.424	1797.5
5944.44	1051.83	2081.21	593	984.545	-236.333
6015.15	-1949.83	2104.44	-2458.8	996.667	832.167
6085.86	745.833	2127.68	2607.2	1008.79	-643
6156.57	2220.67	2150.91	1631.4	1020.91	3884
6227.27	2169.67	2174.14	899	1033.03	-3237.67
6297.98	-3019	2197.37	-688.8	1045.15	-2170.5
6368.69	-474.833	2220.61	-3068.8	1057.27	1238.83
6439.39	2476	2243.84	-5878.8	1069.39	-3492.5
6510.1	5222.5	2267.07	3584.6	1081.52	-186.5
6580.81	-1543.33	2290.3	2303.6	1093.64	68.8333
6651.52	491.667	2313.53	-2947.6	1105.76	2612
6722.22	542.167	2336.77	-4901	1117.88	-2322.83
6792.93	4255.17	2360	-2947.8	1130	1645.5
6863.64	1102
6934.34	1763.67
7005.05	-4239.33
7075.76	2068.67
7146.47	-2764.67
7217.17	-983.833
7287.88	1813.67
7358.59	-2103.33
7429.29	2984
7500	-5766

## Sheet: Bimolecular Plot (Fig 5)
T =	297	K		410	K
	k(297) = (1.05+/- 0.05) e-11			k(410) = (1.92+/- 0.08) e-11
	[OME3]	k	err	[OME3]	k	err
	2.3	2385	119	0	761	24
	2.3	2755	109	0.46	1318	41
	6.3	7671	341	3.3	6761	205
	0.57	964	37	1.8	4409	140
	3.2	4109	184	4.3	9084	417
	4.5	5252	220	1.1	3010	101
	1.3	1822	64	2.6	6445	213
	0	401	52
	0	499	47
	x10^14	s-1	s-1	x10^14	s-1	s-1
