# Supplementary material for: Atmospheric breakdown kinetics and air quality impact of potential “green” solvents the oxymethylene ethers OME3 and OME4
Source: Copernicus journal article supplement (doi:10.5194/egusphere-2025-866), 2025-03-07
Supplement: Supplementary file 2 [file OMe3 GC-FID Blank.pdf › SI/S3 OME Characterisation/S3.1 OMe3/OMe3 GC-FID Blank.pdf]

```
=====
Acq. Operator   :                               Seq. Line :    7
Acq. Instrument : HP 2                         Location  : Vial 96
Injection Date  : 30-Oct-23 4:17:25 PM          Inj       :    1
                                                Inj Volume: 1 µl
Acq. Method     : C:\CHEM32\2\DATA\JDM_DATA\DEF_GC 2023-10-30 13-55-16\FB_10.M
Last changed    : 30-Oct-23 1:55:17 PM
Analysis Method : C:\CHEM32\2\DATA\JDM_DATA\DEF_GC 2023-10-30 13-55-16\FB_10.M (Sequence
                  Method)
Last changed    : 31-Oct-23 9:14:23 AM
                  (modified after loading)
Method Info     : General2, medium ramp, 30 mins
=====
```

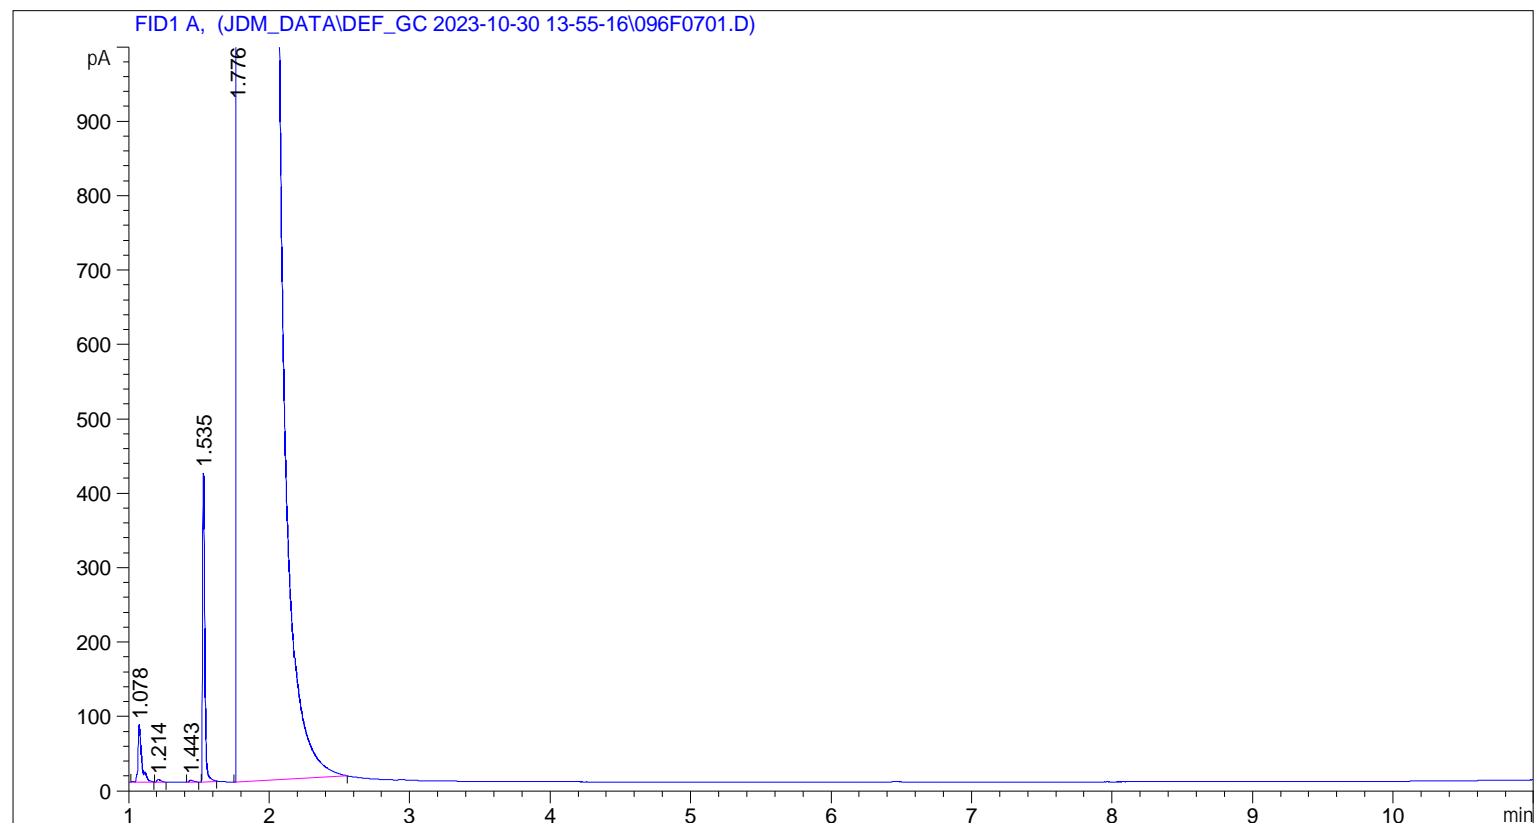

```
=====
                        Area Percent Report
=====
```

```
Sorted By      :      Retention Time
Multiplier     :      1.0000
Dilution       :      1.0000
Do not use Multiplier & Dilution Factor with ISTDs
```

Signal 1: FID1 A,

| Peak # | RetTime [min] | Sig | Type | Area [pA*s] | Height [pA] | Area %   |
|--------|---------------|-----|------|-------------|-------------|----------|
| 1      | 1.078         | 1   | BB   | 141.24754   | 76.73907    | 0.03799  |
| 2      | 1.214         | 1   | BB   | 7.48666     | 3.76080     | 0.00201  |
| 3      | 1.443         | 1   | BB   | 5.31875     | 2.65658     | 0.00143  |
| 4      | 1.535         | 1   | BB   | 454.18158   | 415.70349   | 0.12217  |
| 5      | 1.776         | 1   | BB S | 3.71163e5   | 4.55390e4   | 99.83640 |

Totals :                    3.71772e5   4.60378e4

=====  
\*\*\* End of Report \*\*\*
