# Supplementary material for: Atmospheric breakdown kinetics and air quality impact of potential “green” solvents the oxymethylene ethers OME3 and OME4
Source: Copernicus journal article supplement (doi:10.5194/egusphere-2025-866), 2025-03-07
Supplement: Supplementary file 2 [file S4.1 Relative Rate Data.xlsx]

## Sheet: References
		k(OH)	dk(OH)	k(Cl)	dk(Cl)
	C3H6	2.44e-11	3.66e-12	2.7e-10	3e-11
	Toluene	5.6e-12	1.46e-12	6e-11	6e-12
	CyHex	6.69e-12	6.7e-13	3.3e-10	4.95e-11

## Sheet: OME3+OH
Expt no	OME3	C3H6	Expt no	OME3	Toluene	Expt no	OME3	CyHex
231205-2	0	0	231205-2	0	0	231206-1	0	0		k1/k2	C3H6		k(OH)	dk(OH)
	0.0412364	0.11415		0.0412364	0.0188413		0.0712325	0.068659			0.395038	0.00229125	9.63894e-12	1.46903e-12
	0.0811007	0.210308		0.0811007	0.0474922		0.150272	0.132008		0.0106544	0.00532721	0.00441259
	0.115992	0.298706		0.115992	0.0596905		0.224222	0.170302			0.996015	0.0121855	w	4.63384e+23
	0.143857	0.358402		0.143857	0.0808842		0.28308	0.208116			5498.93	22
	0.173279	0.449292		0.173279	0.0876731		0.347272	0.256569			0.816514	0.00326669
	0.195152	0.489722		0.195152	0.100462		0.395904	0.259594
	0.18164	0.48968		0.18164	0.0986211		0.425886	0.289547		k1/k2	Tol
	0.260921	0.690056		0.260921	0.121054		0.4518	0.293355			1.9565	0.00265551	1.09564e-11	2.87948e-12
	0.333878	0.851481		0.333878	0.174694	231206-2	0	0		0.0648506	0.0324253	0.00662234
	0.39527	1.00991		0.39527	0.220382		0.0302696	0.0144467			0.992909	0.0203976	w	1.20607e+23
	0.470058	1.22611		0.470058	0.235131		0.103703	0.0698157			3640.75	26
	0.627112	1.56838		0.627112	0.328528		0.189197	0.114943			1.51478	0.0108176
	0.56304	1.44768		0.56304	0.30992		0.261154	0.165721
	0.609358	1.56477		0.609358	0.304405		0.323283	0.211123		k1/k2	CyHex
231206-1	0	0	231206-2	0	0		0.382506	0.234786			1.61185	-0.018291	1.07833e-11	1.18792e-12
	0.0712325	0.176722		0.0302696	0.0114233		0.422845	0.275517		0.0739692	0.0369846	0.00957727
	0.150272	0.378825		0.103703	0.0528342		0.471171	0.285152			0.98958	0.0242321	w	7.08644e+23
	0.224222	0.498661		0.189197	0.0898169		0.595313	0.366381			1899.35	20
	0.28308	0.673472		0.261154	0.120049		0.656825	0.409404			1.11529	0.0117439
	0.347272	0.818627		0.323283	0.157123		0.730007	0.461405					k(OH_avg)	1.03892e-11
	0.395904	0.936471		0.382506	0.185756		0.813692	0.510158					dk(OH_avg)	8.79553e-13
	0.425886	1.03087		0.422845	0.207306
	0.4518	1.13782		0.471171	0.229021
				0.595313	0.298938
				0.656825	0.332928
				0.730007	0.38806
				0.813692	0.388861

## Sheet: OME4+OH
Expt no	OME4	C3H6	Expt no	OME4	Toluene	Expt no	OME4	CyHex
231206-3	0	0	231206-3	0	0	231207-1	0	0		k1/k2	C3H6		k(OH)	dk(OH)
	0.0693304	0.137988		0.0693304	0.0269746		0.0429141	0.0259447			0.417193	0.00553351	1.01795e-11	1.68616e-12
	0.125697	0.272722		0.125697	0.0651181		0.0847896	0.0497758			0.0146575	0.0118165
	0.191508	0.384406		0.191508	0.0983664		0.127732	0.0786938			0.973562	0.0330705	w	3.51725e+23
	0.257222	0.513927		0.257222	0.123899		0.148757	0.102062			810.13	22
	0.286462	0.61156		0.286462	0.138204		0.199889	0.124985			0.886003	0.0240604
	0.319248	0.705882		0.319248	0.165311		0.223834	0.142353
	0.356029	0.782994		0.356029	0.192759		0.241901	0.17111		k1/k2	Tol
	0.416157	0.920644		0.416157	0.197992		0.318525	0.218345			2.08194	0.00201752	1.16589e-11	3.06668e-12
	0.49418	1.12117		0.49418	0.256323		0.461575	0.291964			0.0362903	0.00874934
	0.610666	1.32707		0.610666	0.301342		0.499938	0.321484			0.99306	0.0238442	w	1.06332e+23
	0.698883	1.5284		0.698883	0.354143		0.582701	0.381042			3291.2	23
231207-1	0	0	231207-2	0	0	231207-2	0	0			1.8712	0.0130766
	0.0429141	0.0974314		0.106965	0.0473271		0.106965	0.0569438
	0.0847896	0.199056		0.220562	0.098557		0.220562	0.115336		k1/k2	CyHex
	0.127732	0.300136		0.325515	0.14524		0.325515	0.170158			1.7073	-0.00263759	1.14218e-11	1.26195e-12
	0.148757	0.399395		0.407721	0.178559		0.407721	0.209092			0.0398326	0.0112065
	0.199889	0.501862		0.483488	0.208738		0.483488	0.255777			0.987635	0.0327455	w	6.27932e+23
	0.223834	0.574184		0.536567	0.248498		0.536567	0.289874			1837.13	23
	0.241901	0.666786		0.590457	0.283046		0.590457	0.341908			1.96989	0.0246621
	0.318525	0.886193		0.639285	0.292357		0.639285	0.359225					k(OH_avg)	1.10427e-11
	0.461575	1.09441		0.675036	0.318056		0.675036	0.390001					dk(OH_avg)	9.59594e-13
	0.499938	1.31526		0.797006	0.377512		0.797006	0.46578
	0.582701	1.53881		0.90366	0.437421		0.90366	0.53684
				1.0595	0.497582		1.0595	0.608728

## Sheet: OME3+Cl
Expt no	OME3	C3H6	Expt no	OME3	Tol	Expt no	OMe3	CyHex
231212-2	0	0	231212-3	0	0	231212-2	0	0		k1/k2	C3H6		k(Cl)	dk(Cl)
	0.012792	0.0244894		0.159019	0.0679215		0.012792	0.0295772			0.634119	-0.0133844	1.71212e-10	2.22047e-11
	0.047731	0.0842592		0.363829	0.125553		0.047731	0.0995938		0.0424151	0.0212076	0.00814626
	0.0829275	0.152496		0.582324	0.208376		0.0829275	0.180013			0.986756	0.0192863	w	2.0282e+21
	0.117345	0.215593		0.801765	0.282108		0.117345	0.262006			894.047	12
	0.14785	0.27829	231213-1	0	0		0.14785	0.344666			0.33255	0.00446353
	0.18837	0.3449		0.0409	0.0117363		0.18837	0.410129
	0.220824	0.40386		0.0875443	0.0270869		0.220824	0.480014		k1/k2	Tol
	0.251571	0.458705		0.132659	0.0458912		0.251571	0.566079			2.80949	0.00317178	1.68569e-10	1.76373e-11
	0.278685	0.49872		0.179641	0.0580073		0.278685	0.618207		0.0864698	0.0432349	0.0050703
231212-3	0	0		0.220078	0.071324	231213-1	0	0			0.996931	0.0126179	w	3.21467e+21
	0.159019	0.249372		0.260324	0.0913857		0.0409	0.0724648			4222.66	13
	0.363829	0.567184		0.303848	0.106225		0.0875443	0.171709			0.672297	0.00206975
	0.582324	0.886409		0.335846	0.122551		0.132659	0.251784
				0.3667	0.129729		0.179641	0.340233		k1/k2	CyHex
							0.220078	0.425018			0.489011	-0.000856877	1.61374e-10	2.59077e-11
							0.260324	0.525775		0.0279833	0.0139916	0.00567631
							0.303848	0.56338			0.985478	0.0141635	w	1.48985e+21
							0.335846	0.669769			1221.52	18
							0.3667	0.723117			0.245041	0.00361087
													k(Cl_avg)	1.67773e-10
													dk(Cl_avg)	1.21872e-11
														50.1719
														2.0905

## Sheet: OME4+Cl
Expt no	OME4	C3H6	Expt no	OME4	CyHex
231213-2	0	0	231213-2	0	0		k1/k2	C3H6		k(Cl)	dk(Cl)
	0.0891463	0.116045		0.0891463	0.144303			0.698644	0.0113998	1.88634e-10	2.23516e-11
	0.179126	0.229546		0.179126	0.296458		0.0287601	0.0143801	0.00758528
	0.259113	0.343597		0.259113	0.439076			0.997043	0.0121357	w	2.00163e+21
	0.331115	0.4603		0.331115	0.577063			2360.42	7
	0.413845	0.560849		0.413845	0.710159			0.347631	0.00103092
	0.475815	0.668794		0.475815	0.86265
	0.557464	0.76056		0.557464	0.96762
	0.602678	0.876236		0.602678	1.12202
							k1/k2	CyHex
								0.54578	0.0126962	1.80107e-10	2.82407e-11
							0.0249269	0.0124634	0.0083898
								0.996363	0.0134596	w	1.25386e+21
								1917.6	7
								0.347394	0.00126812
										k(Cl_avg)	1.8535e-10
										dk(Cl_avg)	1.75263e-11
											45.4142
											1.89226
