# Supplementary material for: Atmospheric breakdown kinetics and air quality impact of potential “green” solvents the oxymethylene ethers OME3 and OME4
Source: Copernicus journal article supplement (doi:10.5194/egusphere-2025-866), 2025-03-07
Supplement: Supplementary file 3 [file OMe3 GC-FID.pdf › SI/S3 OME Characterisation/S3.1 OMe3/OMe3 GC-FID.pdf]

Sample Name: JDM-1-OMe3A

```

=====
Acq. Operator   :                               Seq. Line :    8
Acq. Instrument : HP 2                         Location  : Vial 100
Injection Date  : 30-Oct-23 4:40:25 PM          Inj       :    1
                                           Inj Volume: 1 µl
Acq. Method     : C:\CHEM32\2\DATA\JDM_DATA\DEF_GC 2023-10-30 13-55-16\FB_10.M
Last changed    : 30-Oct-23 1:55:17 PM
Analysis Method : C:\CHEM32\2\DATA\JDM_DATA\DEF_GC 2023-10-30 13-55-16\FB_10.M (Sequence
                  Method)
Last changed    : 31-Oct-23 9:20:30 AM
                  (modified after loading)
Method Info     : General2, medium ramp, 30 mins
  
```

Additional Info : Peak(s) manually integrated

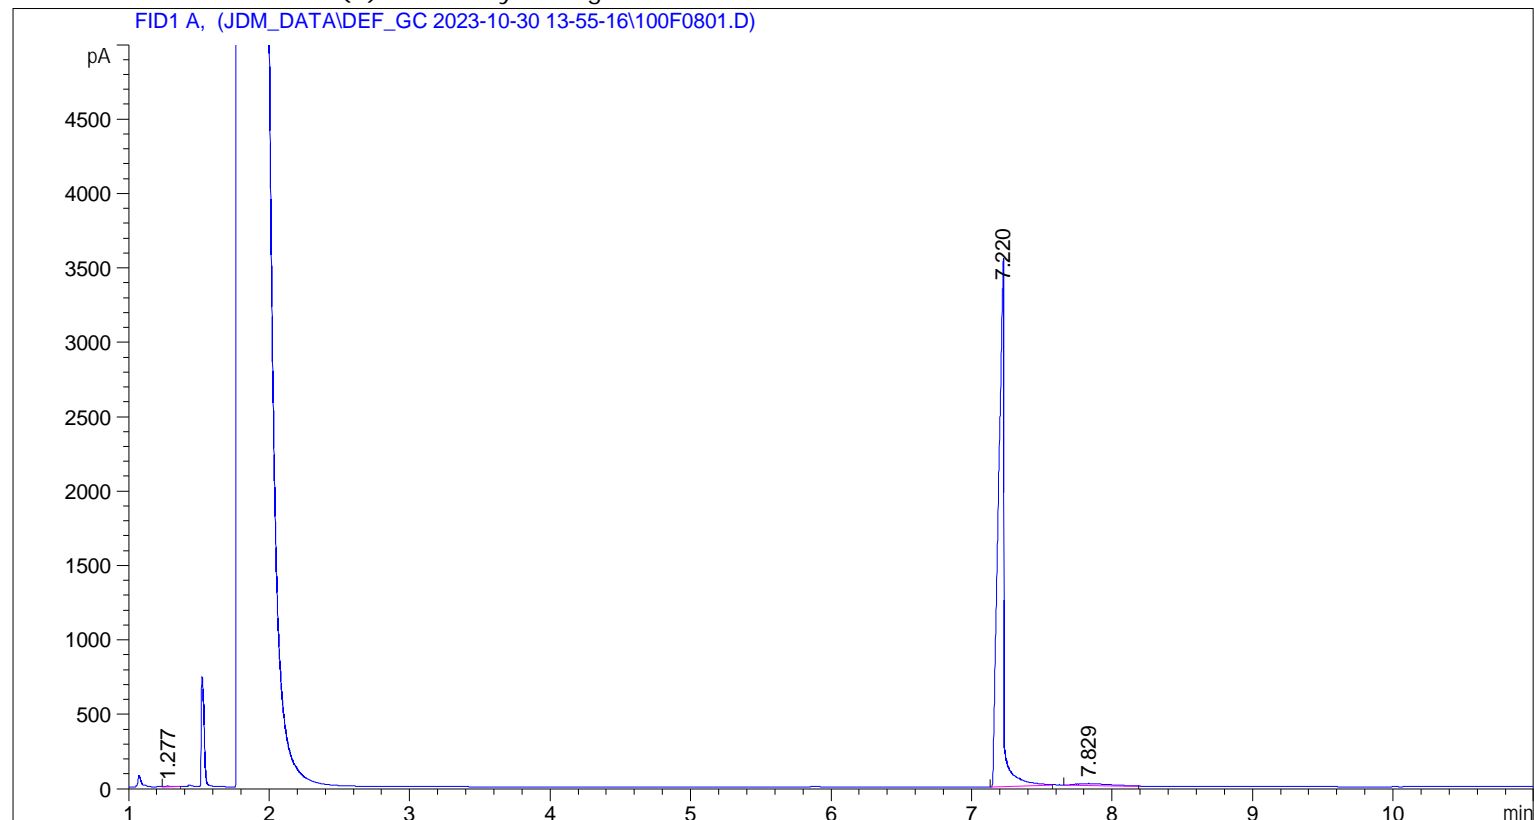

```

=====
                        Area Percent Report
=====
  
```

```

Sorted By      :      Retention Time
Multiplier     :      1.0000
Dilution       :      1.0000
Do not use Multiplier & Dilution Factor with ISTDs
  
```

Signal 1: FID1 A,

| Peak # | RetTime [min] | Sig | Type | Area [pA*s] | Height [pA] | Area %   |
|--------|---------------|-----|------|-------------|-------------|----------|
| 1      | 1.277         | 1   | VB   | 17.00299    | 4.76025     | 0.16727  |
| 2      | 7.220         | 1   | BB   | 9942.40430  | 3366.13940  | 97.80796 |
| 3      | 7.829         | 1   | BB   | 205.82256   | 12.85588    | 2.02477  |

```
Totals :                1.01652e4  3383.75554
```

=====  
\*\*\* End of Report \*\*\*
