# Supplementary material for: Atmospheric breakdown kinetics and air quality impact of potential “green” solvents the oxymethylene ethers OME3 and OME4
Source: Copernicus journal article supplement (doi:10.5194/egusphere-2025-866), 2025-03-07
Supplement: Supplementary file 4 [file OME4 GC-FID .pdf › SI/S3 OME Characterisation/S3.2 OMe4/OME4 GC-FID .pdf]

Sample Name: JDM-1-OMe4A

=====

|                 |   |                                                                                |            |   |         |
|-----------------|---|--------------------------------------------------------------------------------|------------|---|---------|
| Acq. Operator   | : |                                                                                | Seq. Line  | : | 2       |
| Acq. Instrument | : | HP 2                                                                           | Location   | : | Vial 97 |
| Injection Date  | : | 30-Oct-23 2:22:22 PM                                                           | Inj        | : | 1       |
|                 |   |                                                                                | Inj Volume | : | 1 µl    |
| Acq. Method     | : | C:\CHEM32\2\DATA\JDM_DATA\DEF_GC 2023-10-30 13-55-16\FB_10.M                   |            |   |         |
| Last changed    | : | 30-Oct-23 1:55:17 PM                                                           |            |   |         |
| Analysis Method | : | C:\CHEM32\2\DATA\JDM_DATA\DEF_GC 2023-10-30 13-55-16\FB_10.M (Sequence Method) |            |   |         |
| Last changed    | : | 31-Oct-23 9:20:30 AM<br>(modified after loading)                               |            |   |         |
| Method Info     | : | General2, medium ramp, 30 mins                                                 |            |   |         |

Additional Info : Peak(s) manually integrated

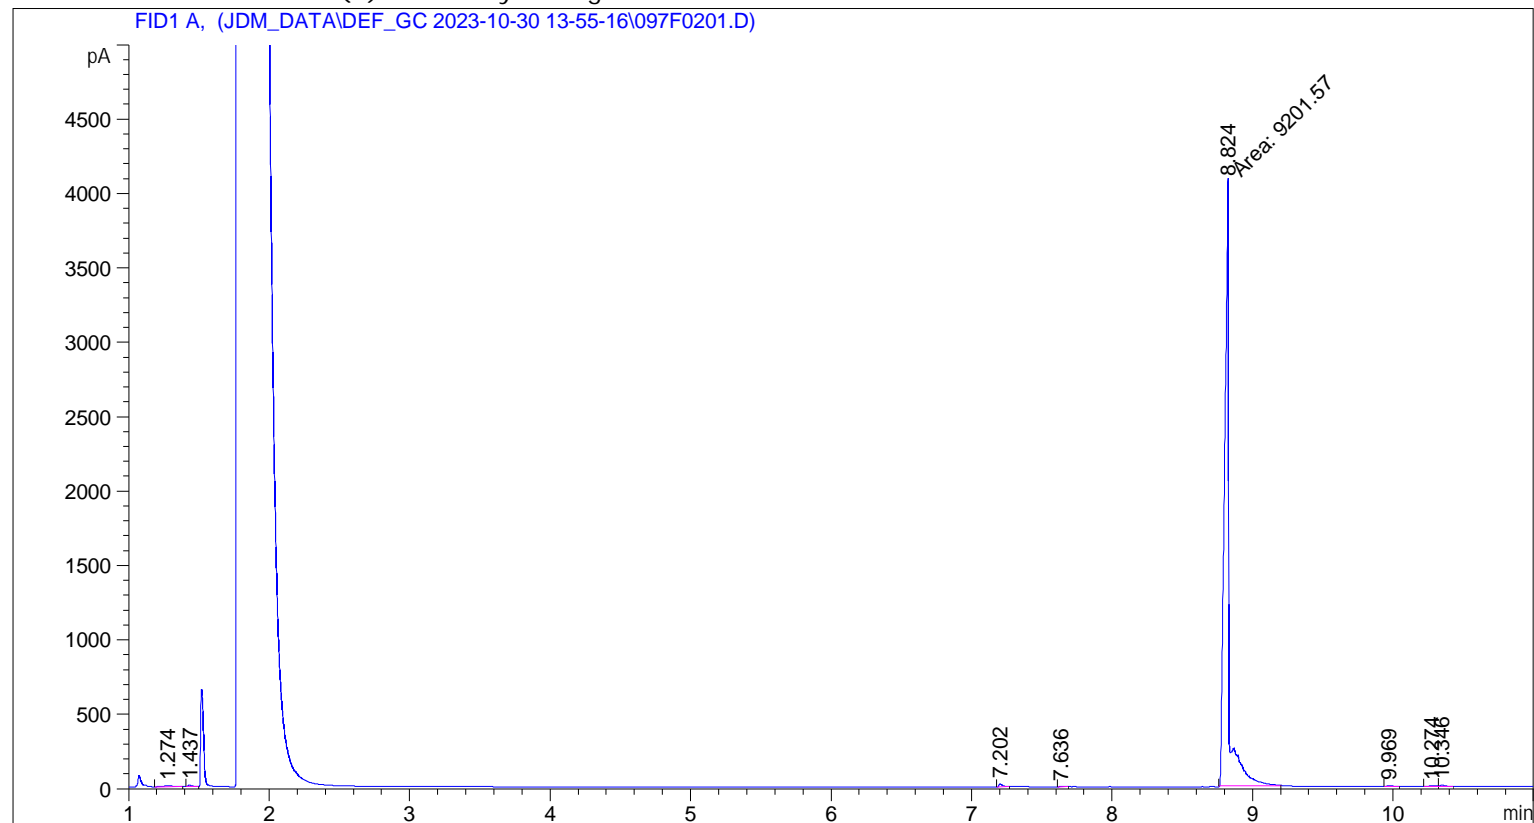

=====

Area Percent Report

=====

Sorted By : Retention Time  
Multiplier : 1.0000  
Dilution : 1.0000  
Do not use Multiplier & Dilution Factor with ISTDs

Signal 1: FID1 A,

| Peak # | RetTime [min] | Sig | Type | Area [pA*s] | Height [pA] | Area %   |
|--------|---------------|-----|------|-------------|-------------|----------|
| 1      | 1.274         | 1   | BB   | 42.35159    | 7.60741     | 0.45182  |
| 2      | 1.437         | 1   | BV   | 23.36383    | 10.62514    | 0.24925  |
| 3      | 7.202         | 1   | BB   | 32.36141    | 18.21927    | 0.34524  |
| 4      | 7.636         | 1   | BB   | 7.91826     | 4.47685     | 0.08447  |
| 5      | 8.824         | 1   | MM   | 9201.57227  | 4062.82886  | 98.16507 |

| Peak<br># | RetTime<br>[min] | Sig | Type | Area<br>[pA*s] | Height<br>[pA] | Area<br>% |
|-----------|------------------|-----|------|----------------|----------------|-----------|
| 6         | 9.969            | 1   | BB   | 21.11243       | 7.49390        | 0.22523   |
| 7         | 10.274           | 1   | BV   | 21.90153       | 6.98396        | 0.23365   |
| 8         | 10.346           | 1   | VB   | 22.98904       | 8.47070        | 0.24525   |

Totals :                    9373.57036 4126.70608

=====  
\*\*\* End of Report \*\*\*
