# Supplementary material for: Atmospheric breakdown kinetics and air quality impact of potential “green” solvents the oxymethylene ethers OME3 and OME4
Source: Copernicus journal article supplement (doi:10.5194/egusphere-2025-866), 2025-03-07
Supplement: Supplementary file 5 [file OME4 GC-FID Blank.pdf › SI/S3 OME Characterisation/S3.2 OMe4/OME4 GC-FID Blank.pdf]

Sample Name: DCM4A

```

=====
Acq. Operator   :                               Seq. Line :    1
Acq. Instrument : HP 2                         Location  : Vial 96
Injection Date  : 30-Oct-23 1:59:31 PM          Inj       :    1
                                                Inj Volume: 1 µl

Acq. Method     : C:\CHEM32\2\DATA\JDM_DATA\DEF_GC 2023-10-30 13-55-16\FB_10.M
Last changed    : 30-Oct-23 1:55:17 PM
Analysis Method : C:\CHEM32\2\DATA\JDM_DATA\DEF_GC 2023-10-30 13-55-16\FB_10.M (Sequence
                  Method)
Last changed    : 31-Oct-23 9:17:10 AM
                  (modified after loading)
Method Info     : General2, medium ramp, 30 mins
=====

```

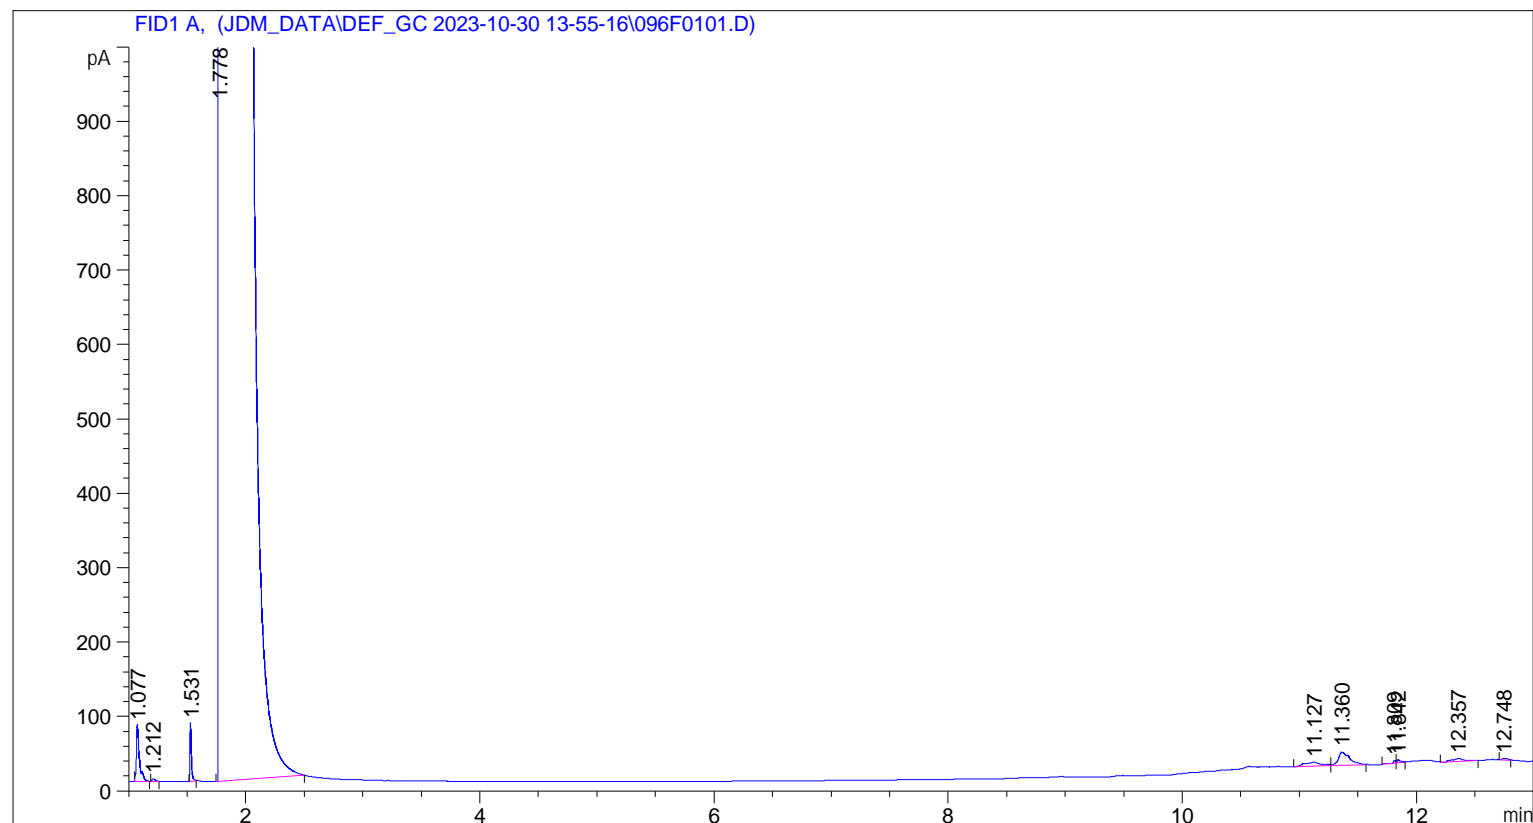

```

=====
                        Area Percent Report
=====

```

```

Sorted By      :      Retention Time
Multiplier    :      1.0000
Dilution      :      1.0000
Do not use Multiplier & Dilution Factor with ISTDs

```

Signal 1: FID1 A,

| Peak # | RetTime [min] | Sig | Type | Area [pA*s] | Height [pA] | Area %   |
|--------|---------------|-----|------|-------------|-------------|----------|
| 1      | 1.077         | 1   | BB   | 136.03206   | 75.18637    | 0.03732  |
| 2      | 1.212         | 1   | BB   | 7.07308     | 3.75976     | 0.00194  |
| 3      | 1.531         | 1   | BB   | 69.18859    | 77.42333    | 0.01898  |
| 4      | 1.778         | 1   | BB S | 3.64065e5   | 4.35920e4   | 99.88192 |
| 5      | 11.127        | 1   | BV   | 51.12153    | 5.35538     | 0.01403  |
| 6      | 11.360        | 1   | VB   | 121.51070   | 17.59421    | 0.03334  |

| Peak<br># | RetTime<br>[min] | Sig | Type | Area<br>[pA*s] | Height<br>[pA] | Area<br>% |
|-----------|------------------|-----|------|----------------|----------------|-----------|
| 7         | 11.809           | 1   | BV   | 4.61725        | 3.82676        | 0.00127   |
| 8         | 11.842           | 1   | VB   | 8.68209        | 3.95384        | 0.00238   |
| 9         | 12.357           | 1   | BB   | 23.73267       | 3.58516        | 0.00651   |
| 10        | 12.748           | 1   | BB   | 8.44667        | 2.48972        | 0.00232   |

Totals :                    3.64495e5   4.37852e4

=====  
\*\*\* End of Report \*\*\*
