# Supplementary material for: Atmospheric breakdown kinetics and air quality impact of potential “green” solvents the oxymethylene ethers OME3 and OME4
Source: Copernicus journal article supplement (doi:10.5194/egusphere-2025-866), 2025-03-07
Supplement: Supplementary file 6 [file OMe4 APCI MS.pdf › SI/S3 OME Characterisation/S3.2 OMe4/OMe4 APCI MS.pdf]

# York - Chemistry - Mass Spectrometry Service Report

JDM-1-OMe4A\_hfs106956jm APCI

## Analysis Information

|                   |                                |                  |                     |
|-------------------|--------------------------------|------------------|---------------------|
| Analysis Filename | hfs106956jm.d                  | Acquisition Date | 31/10/2023 06:29:44 |
| Method            | APCI_LOW MASS_oTOF34 METHODS.m | Instrument       | micrOTOF            |
| Submission Name   | jwg71051rm_3                   | APCI             | Positive            |

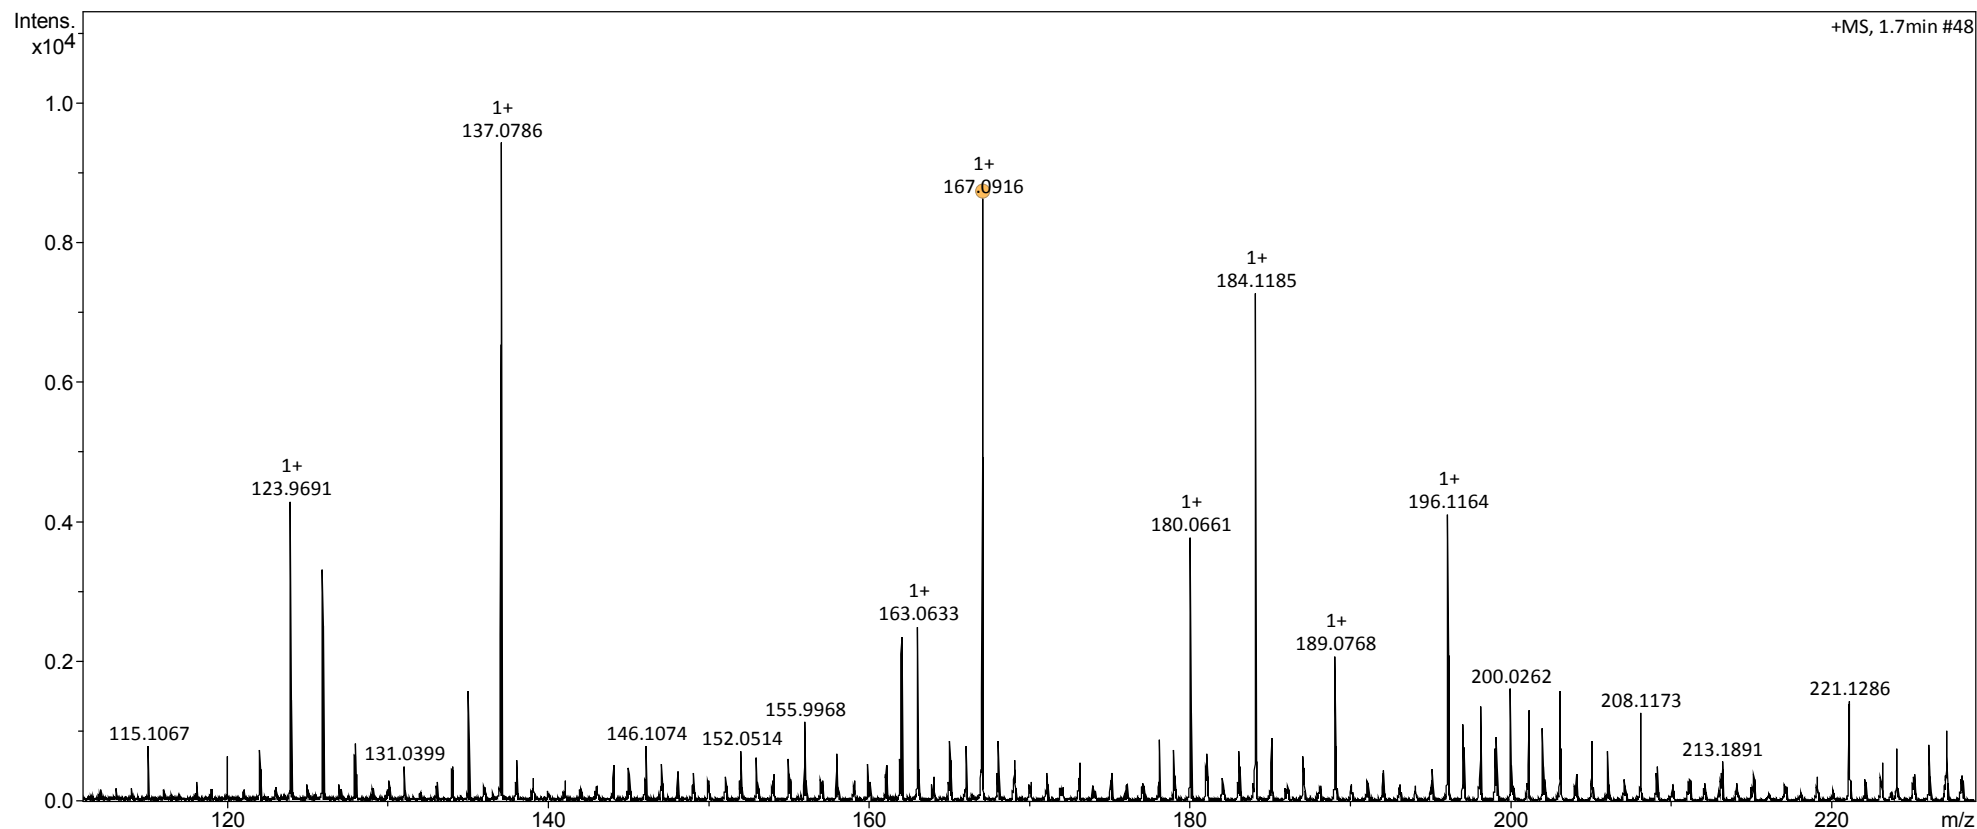

| Meas. m/z  | # | Ion Formula | m/z        | err [ppm] | err [mDa] | mSigma | Mean err [ppm] |
|------------|---|-------------|------------|-----------|-----------|--------|----------------|
| 167.091640 | 1 | C6H15O5     | 167.091400 | -1.4      | -0.2      | 37.4   | 2.0            |
